# Supplementary material for: Topical Triamcinolone Acetonide-Loaded Liposomes Formulation Used as an Adjuvant to Intravitreal Ranibizumab Therapy for Neovascular Age Related Macular Degeneration
Source: Preprints.org preprint supplement (doi:10.20944/preprints202106.0585.v1), 2021-06-23
Supplement: Supplementary file 1 [file supplementary]

**CARTA DE CONSENTIMIENTO INFORMADO**

**CONSENTIMIENTO VALIDAMENTE INFORMADO PARA INVESTIGACIÓN  
EVALUACIÓN DE FORMULACIONES OFTÁLMICAS A BASE DE ACETÓNIDO DE  
TRIAMCINOLONA AL 0.1 – 0.2%**

Nombre del paciente \_\_\_\_\_

Número de Registro \_\_\_\_\_

**PROTOCOLO CRMQ-2015-05-T-02  
INVESTIGADOR PRINCIPAL  
ARTURO SANTOS GARCÍA**

Centro de Retina Médica y Quirúrgica S.C.  
Boulevard Puerta de Hierro 5150 202-A  
Zapopan, Jalisco, México  
C.P. 45116  
Tel: (33) 38-48-54-68 (con 4 líneas)

Comité de Ética en Investigación del Centro Hospitalario Vicor, S.A. de C.V. CHG  
Hospitales  
Calle Nebulosa número 2956  
C.P. 44520 Guadalajara, Jal.  
Tel. Oficina: 01 (33) 3825-6493 Ext. 109

Estamos invitándole a tomar parte en un estudio de investigación a realizarse en las instalaciones de Centro de Retina Médica y Quirúrgica S.C.

**Propósito del estudio**

Determinar la **seguridad y tolerancia** de una formulación para uso tópico oftálmico formulada a base de acetónido de triamcinolona 0.1-0-2%

**Justificación.**

Este estudio intenta la identificación de una dosis ideal que pueda utilizarse en menor frecuencia y por un periodo menor de tiempo, en donde se obtenga un resultado antiinflamatorio del ojo adecuado además, una ventaja potencial de requerir menor cantidad de medicamento reflejándose en el costo asociado al mismo y disminuir la posibilidad de un efecto adverso relacionado a su aplicación crónica.

**Criterios de Inclusión**

Serán incluidos en el estudio (siempre y cuando cumplan con los siguientes criterios de inclusión/exclusión) un total de 56 pacientes inscritos de manera consecutiva quienes sean:

Centro Hospitalario  
Vicor, S.A. de C.V.

**CHG**  
**HOSPITALES**  
Comité de Ética en Investigación  
Firma: \_\_\_\_\_

1. Sujetos entre 18 y 50 años.
2. Sujetos con evaluación oftalmológica catalogada con diagnóstico de padecimientos inflamatorios oculares (blefaritis, conjuntivitis, uveítis, edema macular) sin tratamiento previo.
3. Aquellos que hayan dado su consentimiento informado para participar en este estudio de factibilidad.
4. Aquellos que sean capaces de entender la naturaleza del estudio.
5. Aquellos que seguramente cumplirán con el calendario de revisión.

#### **Criterios de Exclusión**

1. Presencia de enfermedades oculares que puedan causar pérdida de la visión (p Ej. glaucoma o miopía degenerativa)
2. Cirugía intraocular previa, excluyendo cirugía de catarata. Si el sujeto ha tenido cirugía de catarata, debe haber sido > 3 meses previo al ingreso al estudio.
3. Mujeres que están embarazadas, lactando, o con potencial reproductivo.
4. Sensibilidad o alergia conocida a la fluoresceína o rosa de bengala (Colorantes para tinción corneal).
5. Que participe actualmente en otro ensayo clínico de fármacos o dispositivos, que haya participado en un ensayo tal durante el año previo.
6. Historia de uso de fármacos tópicos oculares.
7. Aquellos que se nieguen o son incapaces de dar consentimiento informado o de cumplir con el seguimiento requerido.

#### **Procedimiento**

Uno de sus ojos será asignado al azar a uno de 2 grupos que probarán diferentes formulaciones a base de acetónido de triamcinolona 0.1-0.2%. Los ojos recibirán la formulación asignada con una frecuencia previamente seleccionada por el médico investigador. Se requiere de usted la asistencia a 4 citas para examen ocular completo, mismas que tendrán lugar los días:

- Evaluación Pre-medicación (Día -14 a Día -1)
- Día 1 (24 a 36 horas posteriores al inicio)
- Semana 1 (5 a 10 días posteriores al inicio)
- Semana 2 (12 a 16 días posteriores al inicio)
- Semana 4 (28 a 32 días posteriores al inicio)
- Semana 9 (55 a 65 días posteriores al inicio)
- Semana 14 (85 a 95 días posteriores al inicio)

En cada una de estas visitas a Usted se le realizarán algunos procedimientos relacionados a la valoración de su estado de salud y/o de su estado de salud ocular:

- Exploración clínica general

Centro Hospitalario  
Vicer, S.A. de C.V.

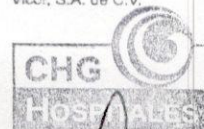

2 Comité de Ética en Investigación  
Firma: \_\_\_\_\_



- Toma de Agudeza visual (estado de salud de sus ojos, medición de su visión)
- Exploración clínica oftalmológica: Una valoración por medio de equipos que utilizan luz pero que en ningún momento tocan sus ojos o causan molestia a los mismos.
- Toma de presión intraocular: El equipo que se utiliza es un equipo que toca durante 1 segundo la superficie de su ojo con el fin de tomar la presión del mismo. Esta toma no es molesta y no requiere de la aplicación de medicamento o de anestésico.
- Toma de fotografías de la superficie de su ojo y del fondo del ojo: Toma de fotografías que no involucra el tocar sus ojos, únicamente se utiliza un cámara especial para ello.
- Tomografía de Óptica Coherente de Retina: Equipo que toma imágenes y realiza mediciones de una parte de su ojo (la retina). Este equipo es cómodo y toma 3 segundos en realizar la toma de imágenes, por lo que es muy seguro (no emite radiación alguna) y la luz que utiliza para tal fin es de poca intensidad.
- Así mismo existe la posibilidad de que se realicen algunos estudios complementarios en caso de que Usted presente alguna otra enfermedad que no exista al inicio del estudio, sea o no relacionada a su enfermedad inicial. En este caso, su médico le dará detalles precisos de algún otro estudio que se requiera, aunque no está contemplado que se utilicen otros estudios como parte este protocolo de investigación
- Ninguno de los procedimientos o estudios genera un costo para Usted.

En resumen, Usted y su(s) acompañantes deberán de acudir a 4 visitas a nuestro Centro en donde se realizarán 6 tipos de exámenes o revisiones. Es importante mencionar que no se tomarán muestras de sangre o exámenes de laboratorio o radiología como parte de este estudio, por lo que no requiere de ninguna forma de ayuda para acudir a sus visitas. En caso de alguna molestia, o de presentar dudas, puede acudir a nuestro Centro en cualquier momento, aunque esto no esté contemplado en el plan original de visitas.

### **Beneficios**

Puede no haber un beneficio directo para usted por su participación en este estudio. La información derivada de este estudio de investigación puede en el futuro generar lineamientos con fines de diagnóstico, tratamiento y avance del conocimiento en esta área de la medicina. Sin embargo, se espera que su condición ocular inflamatoria mejore, e incluso desaparezca, por lo que el beneficio potencial es la mejora o cura de su condición ocular.

### **Riesgos**

Existe el riesgo de intolerancia a la aplicación del artículo de estudio en uno o ambos ojos, existe asimismo el riesgo de aumento de la presión intraocular durante el estudio. Dicho



riesgo es similar al que existe con el uso de fórmulas comercialmente disponibles en México (SOFTRAM, Laboratorios Grin S.A. de C.V.). Específicamente estos riesgos incluyen:

- Ojo rojo
- Lagrimeo
- Ardor ocular
- Aumento de la presión intraocular
- No resolución de su condición inflamatoria ocular, en cuyo caso se le recomendará alguna otra modalidad de tratamiento como se explica más adelante.

En caso de que exista cualquier complicación relacionada al uso de los fármacos en el estudio (incluyendo el uso de la fórmula comercialmente disponible), dicha complicación será tratada en las instalaciones de Centro de Retina Médica y Quirúrgica sin costo alguno para Usted o para su familia.

#### **Alternativas de tratamiento**

Existen algunas alternativas de tratamiento al uso del medicamento propuesto en este protocolo de investigación:

- Uso de la fórmula comercialmente disponible en México (SOFTRAM, Laboratorios Grin, México). Dicha fórmula forma parte de este estudio (grupo de estudio número 3), por lo que Usted puede recibir esta formulación en caso de que su condición no mejore o no acepte participar en este estudio)
- Uso de esteroide intraocular: El uso de otros esteroides oculares como la misma Triamcinolona (fármaco de estudio de este protocolo con nombre comercial ATLC de Laboratorios Grin) o Dexametasona es factible en condiciones inflamatoria oculares. Sin embargo, su uso implica una inyección intraocular que conlleva riesgos mucho mayores como desprendimiento de retina, infección intraocular o pérdida de visión irreversible, por lo que esta alternativa es mucho más invasiva y con mayor riesgo al uso de gotas oculares. Por tal motivo no recomendamos esta alternativa a menos que no exista otra opción de tratamiento.
- Cirugía: En algunos casos reacios a tratamiento médico se debe de realizar cirugía para eliminar el gel vítreo y eliminar la inflamación ocular (edema macular). Sin embargo esta opción de tratamiento se considera la última, ya que será recomendada cuando ninguna de las anteriores haya dado resultado.

#### **Responsabilidades del Sujeto de Estudio.**

Usted, como parte del grupo en estudio, deberá seguir íntegramente las indicaciones de su médico tratante, aplicar las gotas en su (sus) ojos en los horarios asignados y regresar a sus visitas de seguimiento programadas en los días y horarios asignados. Usted no tendrá que pagar absolutamente nada por su tratamiento oftálmico durante el estudio.

Centro Hospitalario  
Vicer, S.A. de C.V.

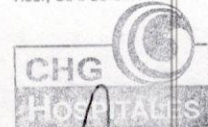

Comité de Ética en Investigación

Firma: \_\_\_\_\_



### Criterios de discontinuación prematura o de sustitución de pacientes

**\*\* Se debe discontinuar al paciente si se produce alguna de las siguientes circunstancias:\***

- 1 El investigador considera que es en el mejor interés del paciente.
- 2 El paciente solicita el abandono del estudio.
- 3 Después de que el paciente inicie el tratamiento en estudio, se descubre que se han violado los criterios de selección.

Si, por cualquier motivo, el paciente discontinúa antes de finalizar el curso completo del tratamiento o de la evaluación, se deben realizar lo antes posible los procedimientos correspondientes a una visita de finalización, incluyendo una evaluación clínica. En el Formato de Reporte de Caso (FRC), se debe anotar el motivo de la discontinuación.

En el caso de que un paciente experimente un acontecimiento adverso no grave esperado, se le puede, a juicio del investigador, permitir que continúe en el estudio. Este paciente será evaluable durante el resto del periodo.

Cuando se “pierda el seguimiento” de un paciente (esto es, que no se presente a las visitas del estudio), se debe hacer un esfuerzo razonable para contactar con él y determinar la causa de la incomparecencia. Esta información debe reflejarse en el FRC. Cuando, con independencia de la causa, se retire a un paciente del estudio, se deben efectuar todas las evaluaciones que se exigen en la visita de finalización.

#### Otros:

Es muy importante que usted lea, o alguien lea para usted algunos principios generales que aplican a todo aquel que toma parte en este tipo de estudios:

- a) Usted debe tener 18 años de edad o más para poder participar
- b) Es TOTALMENTE VOLUNTARIO tomar parte de este estudio
- c) Su CONFIDENCIALIDAD SERÁ GUARDADA EN TODO MOMENTO Y SU PRIVACIDAD SERÁ RESPETADA POR TODOS LOS QUE CONFORMAN PARTE DE ESTE ESTUDIO Y TODOS LOS QUE LABORAN EN LA UNIDAD HOSPITALARIA.
- d) Puede no obtenerse un beneficio personal al participar en este estudio, pero el conocimiento generado puede beneficiar a otros o a usted mismo en el futuro.
- e) Usted es libre de rehusarse a participar o de abandonar el estudio en el momento que lo desee.
- f) No habrá para usted ningún cargo por concepto de la aplicación del tratamiento o de las revisiones clínicas para su condición.
- g) Una vez que los resultados de una investigación son reportados en revistas médicas o congresos siempre se protege la identidad de los participantes. Los expedientes clínicos se resguardarán en el Hospital por 5 años de acuerdo a la Norma Oficial Mexicana del Expediente Clínico.

Centro Hospitalario  
Vicer, S.A. de C.V.

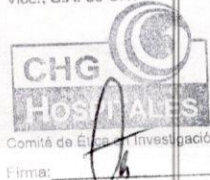



- h) Se le notificará de inmediato cualquier hallazgo significativo que se desarrolle durante el curso de la presente investigación que pueda influir en su voluntad de continuar participando de ésta.
- i) Daños relacionados a la Investigación: Estará disponible la atención inmediata de nuestra parte en caso de ser necesaria si algún individuo sufre algún daño relacionado directamente a la investigación (sin costo alguno). Se garantiza la continuidad del tratamiento médico y la indemnización a la que legalmente tendría derecho el sujeto de estudio bajo investigación en caso de sufrir daños directamente relacionados con la propia investigación a través de la cobertura del Seguro que para el efecto ha sido contratado por el patrocinador. Para mayor información puede comunicarse al Instituto Jalisciense de Investigación Clínica SA de CV, ubicado en Penitenciaría # 20, Col. Centro, Guadalajara, Jal. 44100, Tels: (33) 38256493 Ext. 109 y al (33) 15243114, [www.ijicsa.org.mx](http://www.ijicsa.org.mx) o al Centro de Retina Médica y Quirúrgica S.C. a la dirección abajo expresada.
- j) Este estudio no le generará costo alguno y, en caso de que se presente algún evento adverso, este será tratado si costo alguno en las instalaciones de Centro de Retina Médica y Quirúrgica en Centro Médico Puerta de Hierro.

En caso de que Usted presente cualquier emergencia, o tenga alguna duda, por favor comuníquese a los siguientes números o preséntese a la siguiente dirección:

Centro de Retina Médica y Quirúrgica S.C.  
Boulevard Puerta de Hierro 5150 202-A  
Zapopan, Jalisco, México  
C.P. 45116  
Tel: (33) 38-48-54-68 (con 4 líneas)

Así mismo, incluimos los datos del Comité de Ética en Investigación para ponerlo a sus órdenes en caso de tener alguna duda o pregunta:

Comité de Ética en Investigación del Centro Hospitalario Vicor, S.A. de C.V. CHG Hospitales  
Calle Nebulosa número 2956  
C.P. 44520 Guadalajara, Jal.  
Tel. Oficina: 01 (33) 3825-6493 Ext. 109

Por último, ponemos a su disposición un número telefónico de contacto 24 horas:

333-955-6189, En donde puede localizar al Investigador principal del estudio, el Dr. Arturo Santos García o al teléfono 333-809-3321 en donde puede localizar al sub-investigador del estudio, el Dr. Juan Carlos Altamirano Vallejo. Por favor, no dude en marcar a alguno de estos teléfonos en caso de que Usted o sus familiares tengan alguna duda, pregunta o alguna molestia (cualquiera que esta sea)

Centro Hospitalario  
Vicor, S.A. de C.V.

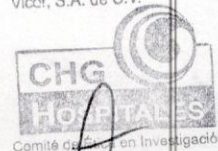

“Yo certifico que he leído este formato, o que alguien lo ha leído para mí, además reconozco que lo he comprendido por completo; que he tenido la oportunidad de hacer preguntas, y que las respuestas e información adicional que se me han brindado son de mi entera satisfacción, se me ha informado también que debo contactar al Dr. ARTURO SANTOS GARCÍA o al DR. JUAN CARLOS ALTAMIRANO VALLEJO al Teléfono 333-955-6189 o al 333-809-3321 para contestar cualquier pregunta o duda que yo tenga durante la Investigación; asimismo que en cualquier momento puedo contactar al Instituto Jalisciense de Investigación Clínica SA de CV, ubicado en Penitenciaría # 20, Col. Centro, Guadalajara, Jal. 44100, Tels: (33) 38256493 Ext. 109 y al (33) 15243114, [www.ijicsa.org.mx](http://www.ijicsa.org.mx).

Yo entiendo que debido a que se trata de un nuevo tratamiento, no se conocen todos los efectos adversos y que en caso de que ocurran debo contactar inmediatamente a:

Centro de Retina Médica y Quirúrgica S.C.  
Boulevard Puerta de Hierro 5150 202-A  
Zapopan, Jalisco, México  
C.P. 45116  
Tel: (33) 38-48-54-68 (con 4 líneas)

Yo estoy de acuerdo en participar como un sujeto en el entendido que puedo abandonar el estudio en cualquier momento sin interferir con mi cuidado regular”

|       |                                      |
|-------|--------------------------------------|
| Fecha | Nombre y Firma o huella del paciente |
| Fecha | Dr. Firma del médico                 |
| Fecha | Testigo 1                            |
| Fecha | Testigo 2                            |
| Fecha | Testigo 3                            |
| Fecha | Testigo 4                            |
