# Supplementary material for: Topical Triamcinolone Acetonide-Loaded Liposomes Formulation Used as an Adjuvant to Intravitreal Ranibizumab Therapy for Neovascular Age Related Macular Degeneration
Source: Preprints.org preprint supplement (doi:10.20944/preprints202106.0585.v1), 2021-06-23
Supplement: Supplementary file 2 [file supplementary]

**ESTADOS UNIDOS MEXICANOS**  
**COMISIÓN FEDERAL PARA LA PROTECCIÓN CONTRA RIESGOS SANITARIOS**  
**COMISIÓN DE AUTORIZACIÓN SANITARIA**

*"Año del Centenario de la Promulgación de la Constitución Política de los Estados Unidos Mexicanos".*

**Eyentrepeneur Corporativo, S.A. de C.V.**  
Torcuato Tasso No. 245 2º piso, Col. Polanco V Sección  
Del. Miguel Hidalgo, C.P. 11560, Ciudad de México.

**173300410A0035/2017**

Ciudad de México, a. 10 de julio de 2017.

En respuesta a la solicitud con número de ingreso 173300410A0035 de fecha 23 de junio de 2017, recibida en el Centro Integral de Servicios (CIS), se extiende la siguiente notificación con fundamento en los artículos 4º párrafo tercero, 8º, 14º y 16º de la Constitución Política de los Estados Unidos Mexicanos; 17º, 39º fracciones XV, XXI y XXIV de la Ley Orgánica de la Administración Pública Federal; 1º, 2º, 3º, 15º, de la Ley Federal de Procedimiento Administrativo; 1º, 3º fracciones I, XXII y XXV, 4º fracción III, 13º Apartado A fracciones IX y X, 17º bis fracción IV, 102º, 194º último párrafo, 194º bis, 204º, 262º, 315º, 316º, 317º, 317º bis, 317º bis 1, 318º y 319º del Título Décimo Cuarto, 368º y 371º de la Ley General de Salud; 1º, 2º inciso C fracción X y 36º del Reglamento Interior de la Secretaría de Salud; 1º, 2º, 3º, 4º, 5º, 6º, 7º, 13º, 14º, 16º, 21º, 22º, 62º, 64º, 67º, 73º, 98º y 116º fracción VI del Reglamento de la Ley General de Salud en Materia de Investigación para la Salud; 1º, 155º, 156º y 184º del Reglamento de Insumos para la Salud; 1,3 fracciones I inciso b, VI, VII y XII, 4º fracción II inciso c y 14º fracción I del Reglamento de la Comisión Federal para la Protección contra Riesgos Sanitarios, así como de los artículos 7º, 8º, 9º, 10º y 11º del Acuerdo por el que se dan a conocer los trámites y servicios, así como los Formatos que aplica la Secretaría de Salud, a través de la Comisión Federal para la Protección Contra Riesgos Sanitarios, inscritos en el Registro Federal de Trámites y Servicios de la Comisión Federal de Mejora Regulatoria, publicado en el Diario Oficial el día 01 de Julio de 2013.

Se autoriza la conducción del protocolo de investigación:

**Título** "Evaluación de Formulaciones Oftálmicas a base de Acetónido de Triamcinolona al 0.1 – 0.2%"  
**No. de protocolo** CRMQ-2015-05-T-02  
**Patrocinador** Centro de Retina Médica y Quirúrgica, S.C.

Centro(s) de investigación participante(s):

**Centro de Retina Médica y Quirúrgica, S.C.**

Dirección: Blvd. Puerta de Hierro 5150, Int. 202-A, Plaza corporativa Zapopan, C.P. 45116, Zapopan, Jalisco.

Institución para la atención de urgencias médicas: Hospital de Especialidades Puerta de Hierro, S.A. de C.V.

Dirección: Empresarios 150, Fraccionamiento Puerta de Hierro, C.P. 45116, Zapopan, Jalisco.

Investigador principal: Dr. Arturo Santos García.

**Comité de Ética en Investigación (CEI):** Centro Hospitalario Vicor, S.A. de C.V. CHG Hospitales.

Dirección: Nebulosa No. 2956, Jardines del Bosque, C.P. 44520 Guadalajara, Jalisco.

Dictamen avalado por: Dr. Dante Daniel Hernández Colín, Presidenta del Comité.

Fecha de aprobación: 13 de Diciembre de 2016.

**Comité de Investigación (CI):**

Instituto Jalisciense de Investigación Clínica S.A. de C.V.

Dirección: Penitenciaría No. 20 Col. Centro CP 44100 Guadalajara, Jalisco.

Dictamen avalado por: Dr. Ricardo Osvaldo Jauregui Franco, Presidente del Comité.

Fecha de aprobación: 03 de junio de 2016.

Documento(s) aprobado(s) para el (los) centro(s) arriba citado(s), de acuerdo al dictamen del Comité Evaluador:

1. Protocolo de Investigación CRMQ-2015-05-T-02, versión 2.1 de fecha 03 de Febrero de 2016.
2. Consentimiento Informado versión 2.2 de fecha 05 de Diciembre de 2016.
3. Manual del Investigador versión 2.1 de fecha 03 de Febrero de 2016.

**Objetivo principal:** Evaluar la eficacia y seguridad de una formulación a base de Acetónido de Triamcinolona al 0.2% en comparación con una formulación comercialmente disponible de Acetónido de Triamcinolona al 0.1% (Softfram, Laboratorios Grin, S.A. de C.V.), en pacientes con inflamación del segmento posterior del ojo.

**ESTADOS UNIDOS MEXICANOS**  
**COMISIÓN FEDERAL PARA LA PROTECCIÓN CONTRA RIESGOS SANITARIOS**  
**COMISIÓN DE AUTORIZACIÓN SANITARIA**

"Año del Centenario de la Promulgación de la Constitución Política de los Estados Unidos Mexicanos".

**Eyentrepneur Corporativo, S.A. de C.V.**  
Torcuato Tasso No. 245 2º piso, Col. Polanco V Sección  
Del. Miguel Hidalgo, C.P. 11560, Ciudad de México.

173300410A0035/2017  
Ciudad de México, a. 10 de julio de 2017.

**Diseño del estudio:** Este es un estudio clínico experimental, Fase II-a, prospectivo, aleatorizado, cegado, comparativo, de 2 diferentes grupos de estudio: Grupo 1 Acetónido de Triamcinolona al 0.1 %. Grupo 2: Acetónido de Triamcinolona al 0.2 %, el estudio está diseñado para demostrar la seguridad de una formulación a base de Acetónido de Triamcinolona al 0.2 % y la eficacia de esta misma en comparación con la formula comercialmente disponible en México a base de Acetónido de Triamcinolona al 0.1 % Ambos por vía tópica Oftálmica, Ambos sexos, Edad entre 18 a 50 años.

| Grupo (s) de tratamiento |                                      | Forma Farmacéutica y concentración | Vía de administración | Intervalo de administración y dosis                             | Duración del tratamiento |
|--------------------------|--------------------------------------|------------------------------------|-----------------------|-----------------------------------------------------------------|--------------------------|
| G1                       | Acetónido de Triamcinolona al 0.1 %" | Solución Oftálmica                 | tópica oftálmica      | 1 gota 4 veces al día durante el período de vigilia, ambos ojos | 90 días                  |
| G1                       | Acetónido de Triamcinolona al 0.1 %" |                                    |                       |                                                                 |                          |

**Tamaño de muestra:** 56 sujetos, divididos en 2 grupos [28 sujetos (20 ojos) expuestos por grupo].

**Pruebas o procedimientos:**

Agudeza visual corregida ETDRS (ambos ojos), Sensibilidad al contraste (ambos ojos), Tonometría (ambos ojos), Presión intraocular, Biomicroscopía con Lámpara de Hendidura incluyendo Tinción Corneal y Conjuntival con Fluoresceína y Rosa de Benjale Fotografía de Fondo de Ojo, Tomografía de óptica Coherente de retina, Angiografía del fondo de ojo con Fluoresceína, Prueba de Embarazo

Las muestras biológicas obtenidas no serán utilizadas para líneas celulares permanentes ni inmortales.

Los listados de insumos que integran la solicitud de autorización sólo se consideran de conocimiento y no de autorización.

Se reitera el compromiso de enviar los reportes de sospechas de eventos y reacciones adversas al Centro Nacional de Farmacovigilancia.

Deberá notificar a esta Comisión de Autorización Sanitaria la conclusión del estudio, anexando los datos sobresalientes y conclusiones.

Deberá registrar la información complementaria de su investigación a través del portal del Registro Nacional de Ensayos Clínicos (RNEC) en la sección de "protocolos de investigación en seres humanos" disponible en la página web de COFEPRIS, en un plazo no mayor a 5 días hábiles a partir de la recepción del presente.

Para efectos de validez de la autorización, si se señala "D.F." ó "Distrito Federal", deberá entenderse como "Ciudad de México".

**SUFRAGIO EFECTIVO, NO REELECCIÓN**  
**COMISIONADO DE AUTORIZACIÓN SANITARIA**

JUAN CARLOS GALLAGA SOLÓRZANO

RDB
